# Supplementary material for: A brief report: de novo copy number variants in children with attention deficit hyperactivity disorder
Source: PubMed Central journal article supplement (PMC7217839; doi:10.1038/s41398-020-0821-y), 2020-05-12

**Supplementary Figure 1:  
Probe intensity traces for *de novo* CNVs in  
each parent-offspring trio**

A)

4p16.3

16p12.2

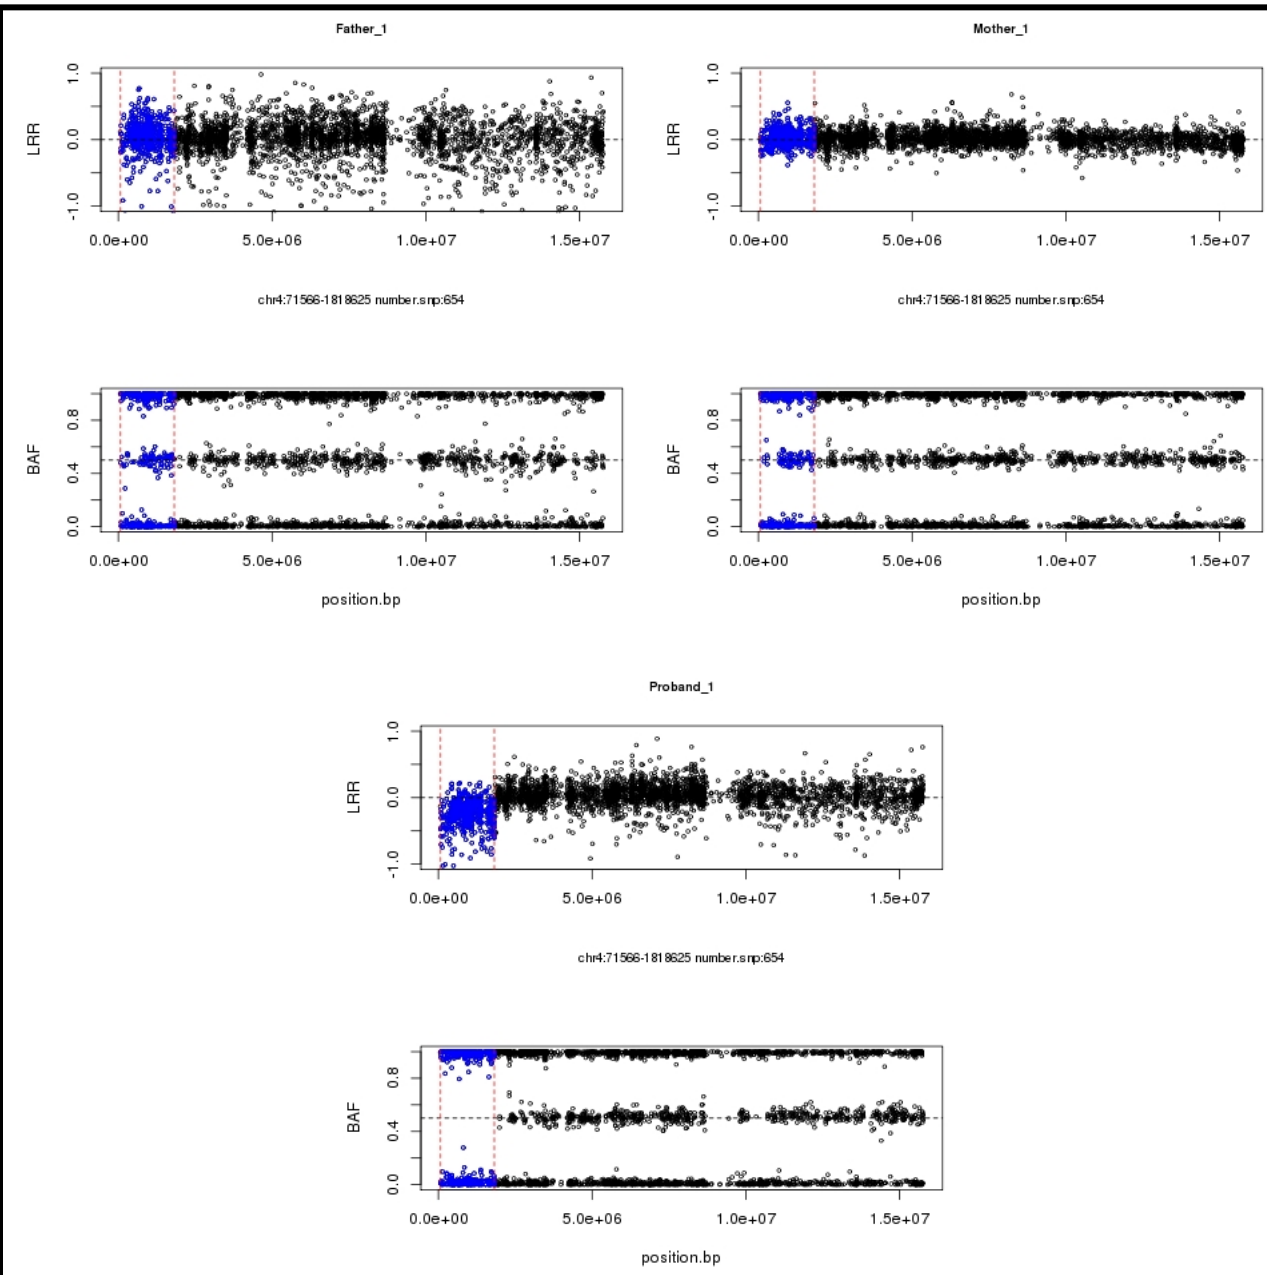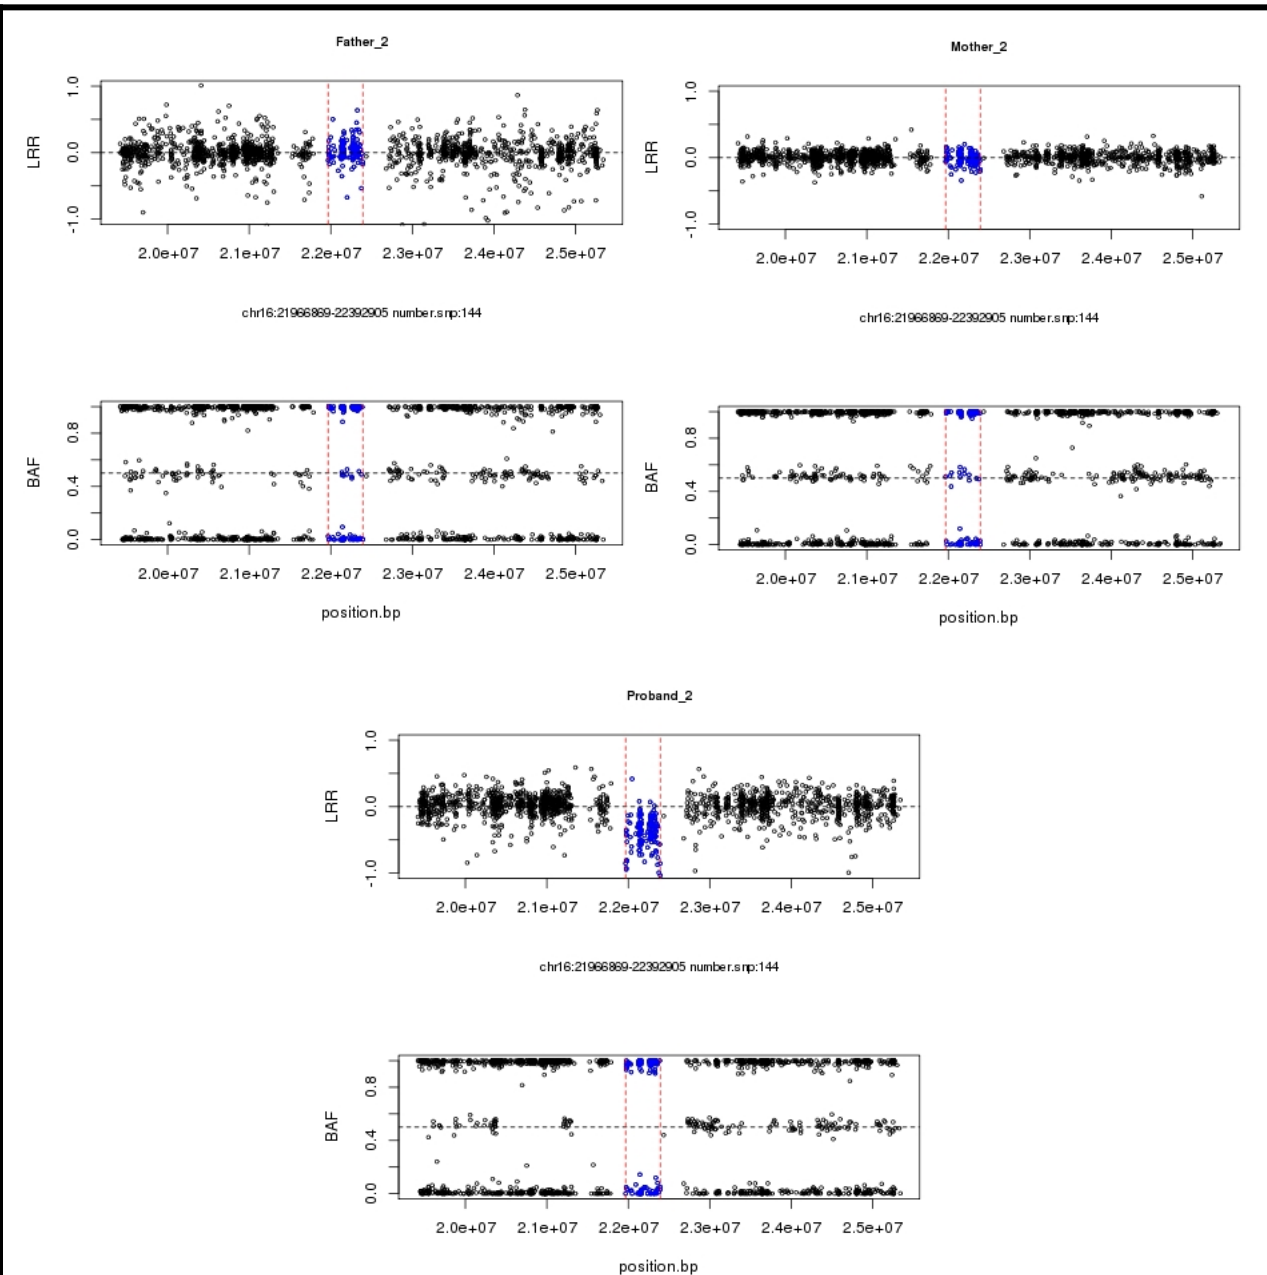

**B)****10q22.2****20p13**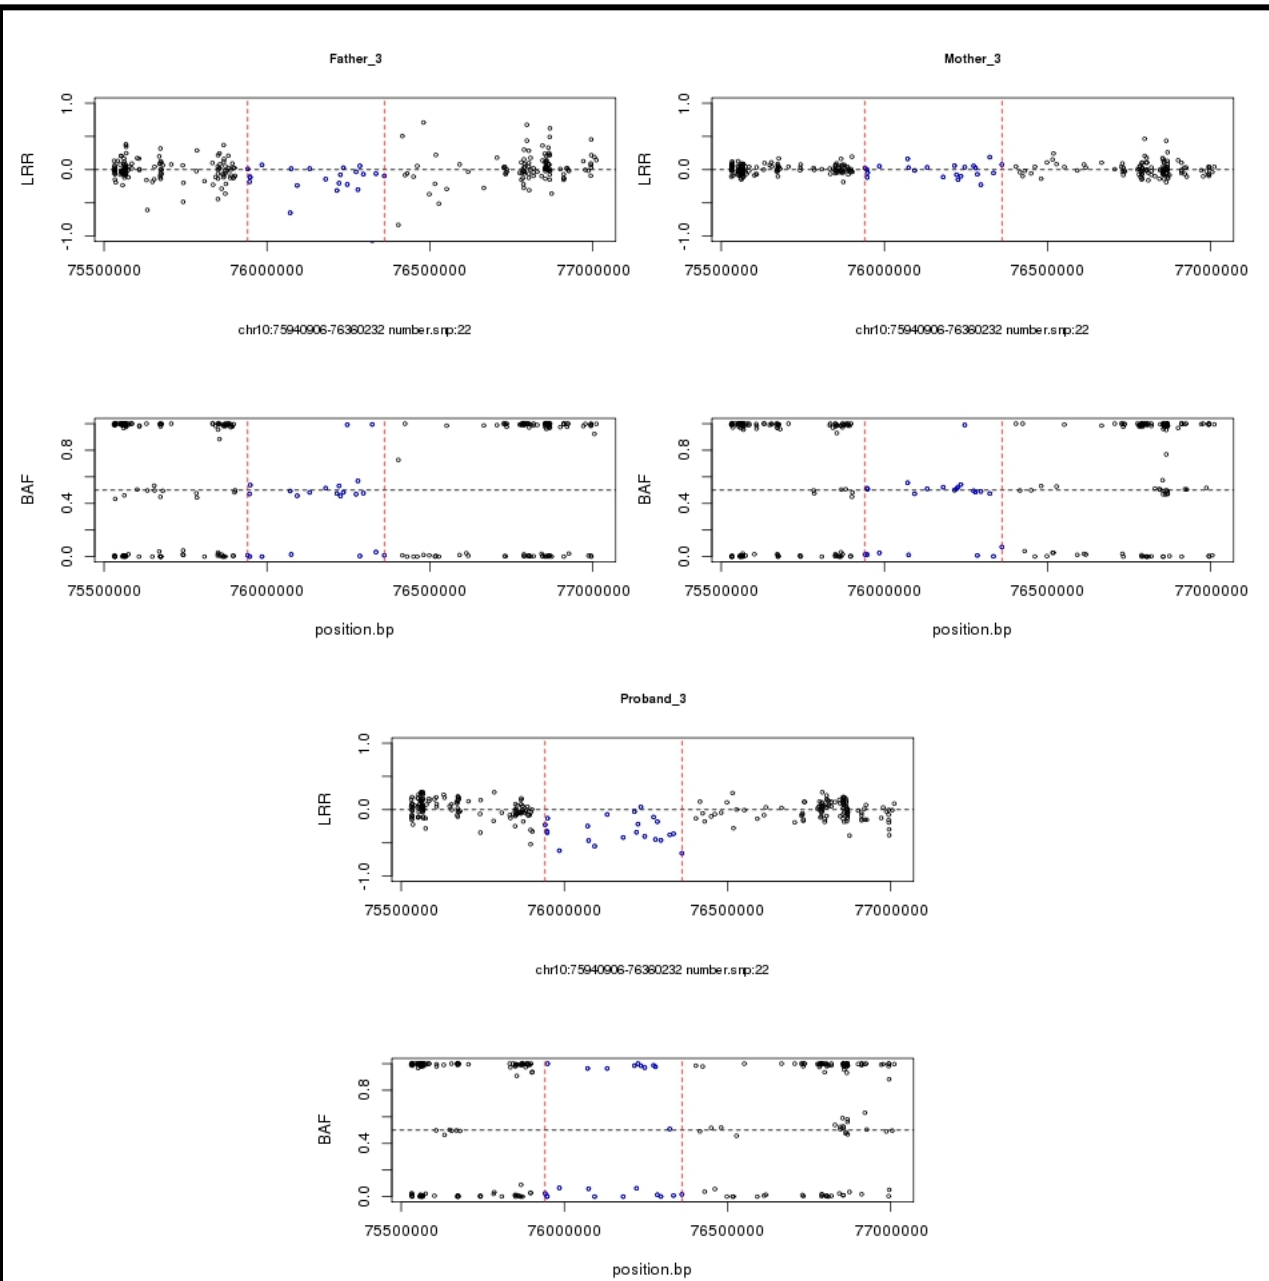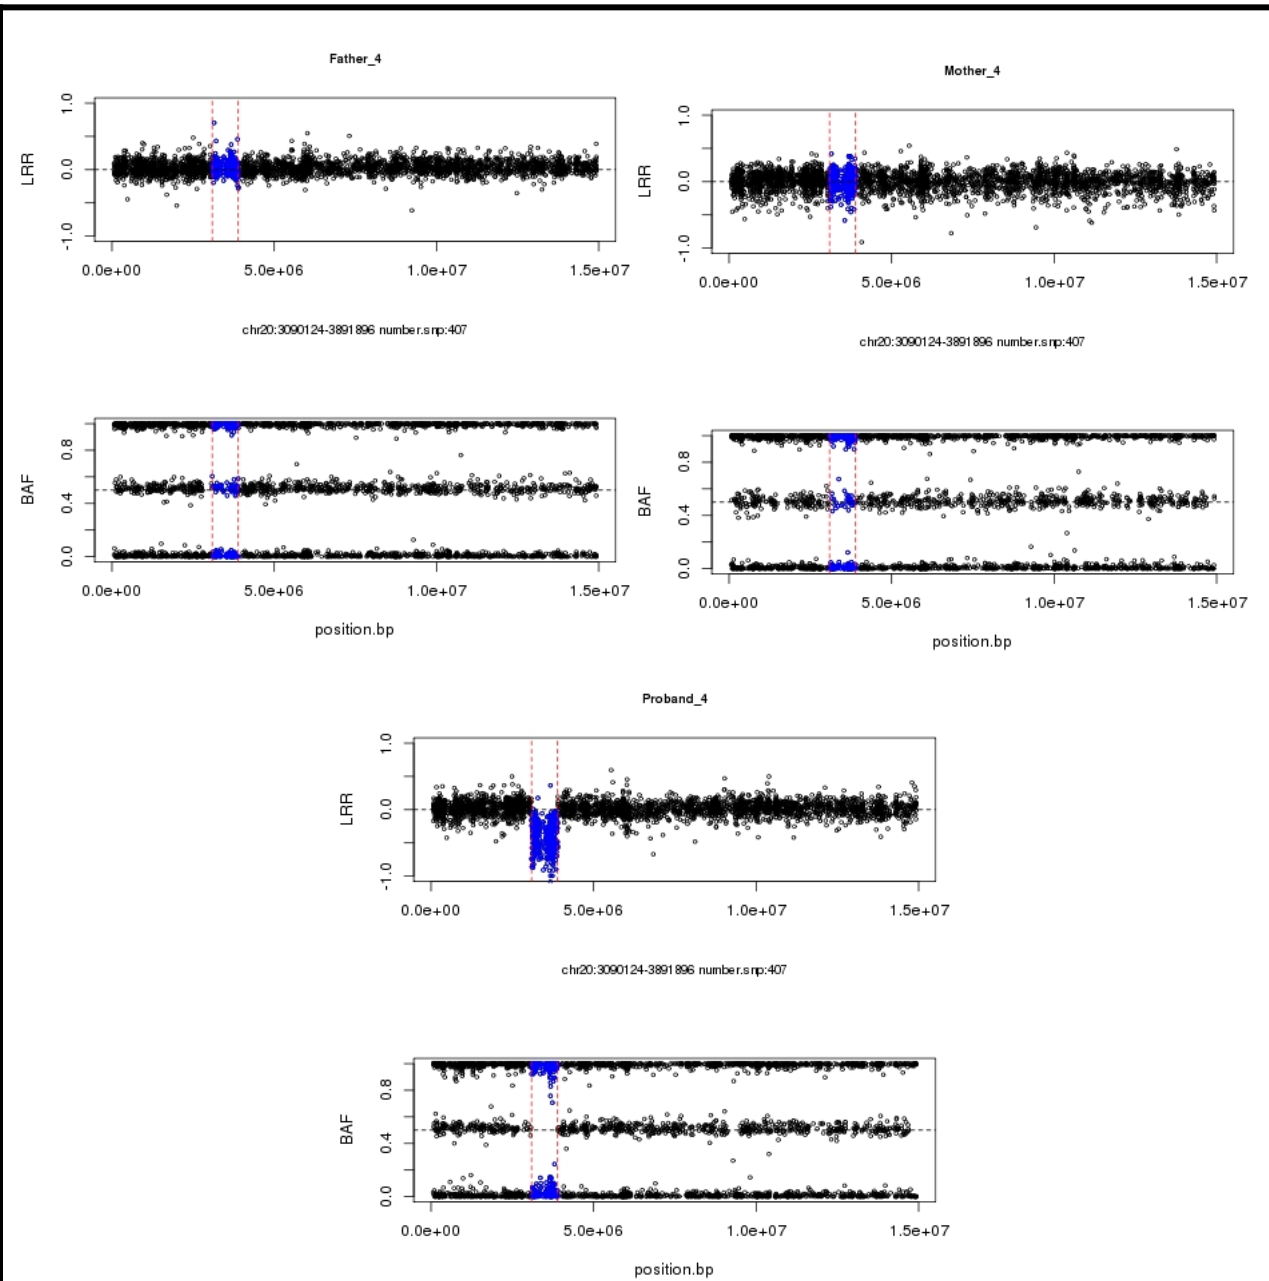

C) 10q11.22-q11.23

15q26.3

Father\_5

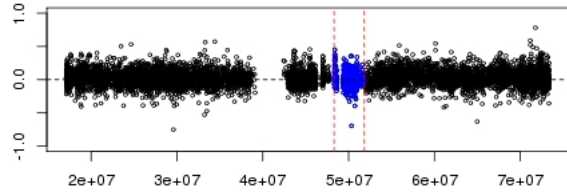

chr10:48302618-51832220 number.srp:738

Mother\_5

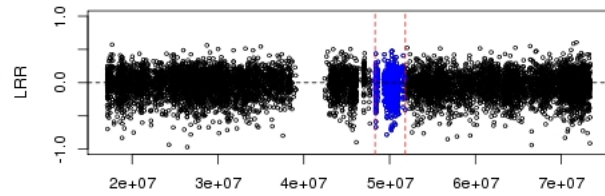

chr10:48302618-51832220 number.srp:738

Father\_6

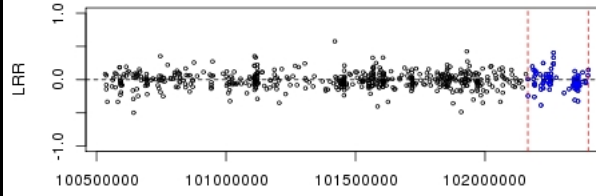

chr15:102165387-102398631 number.srp:87

Mother\_6

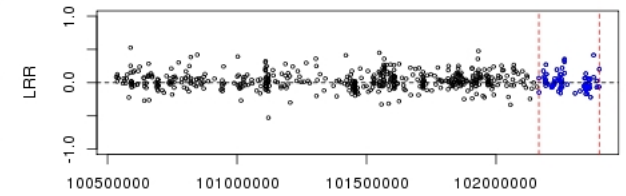

chr15:102165387-102398631 number.srp:87

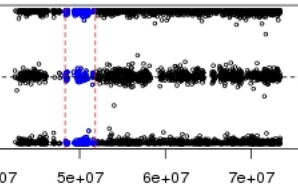

position.bp

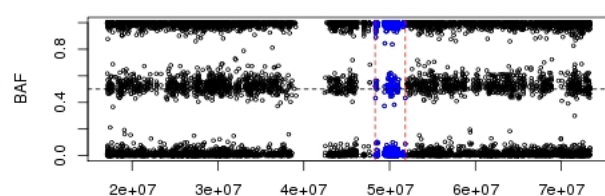

position.bp

Proband\_5

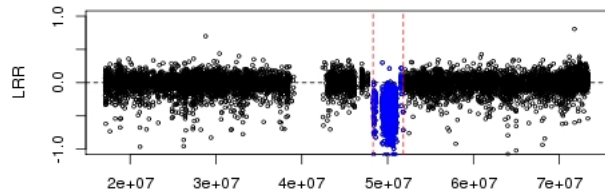

chr10:48302618-51832220 number.srp:738

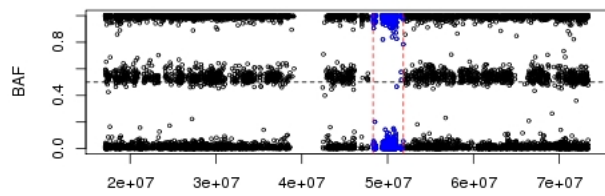

position.bp

Proband\_6

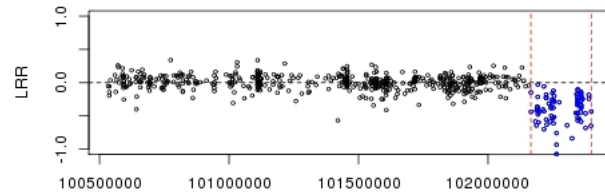

chr15:102165387-102398631 number.srp:87

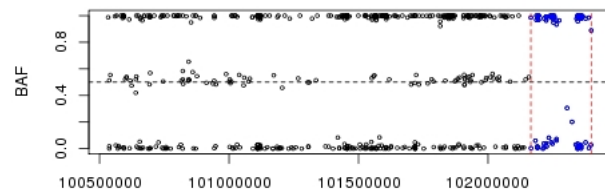

position.bp

# D) 15q13.1-q13.2

# 22q11.21

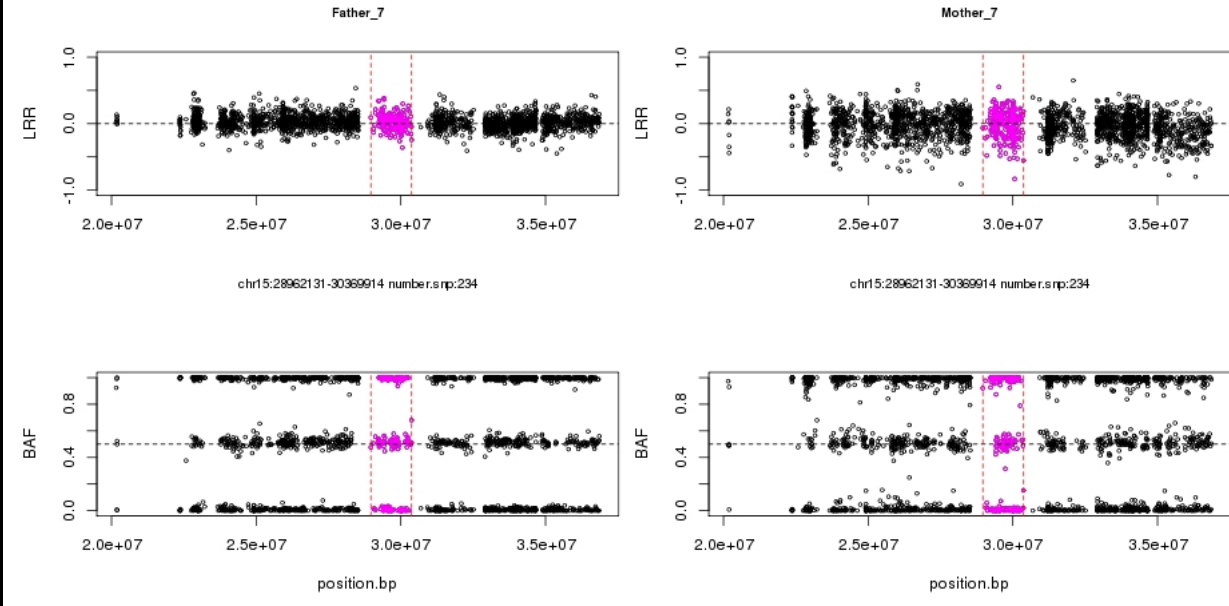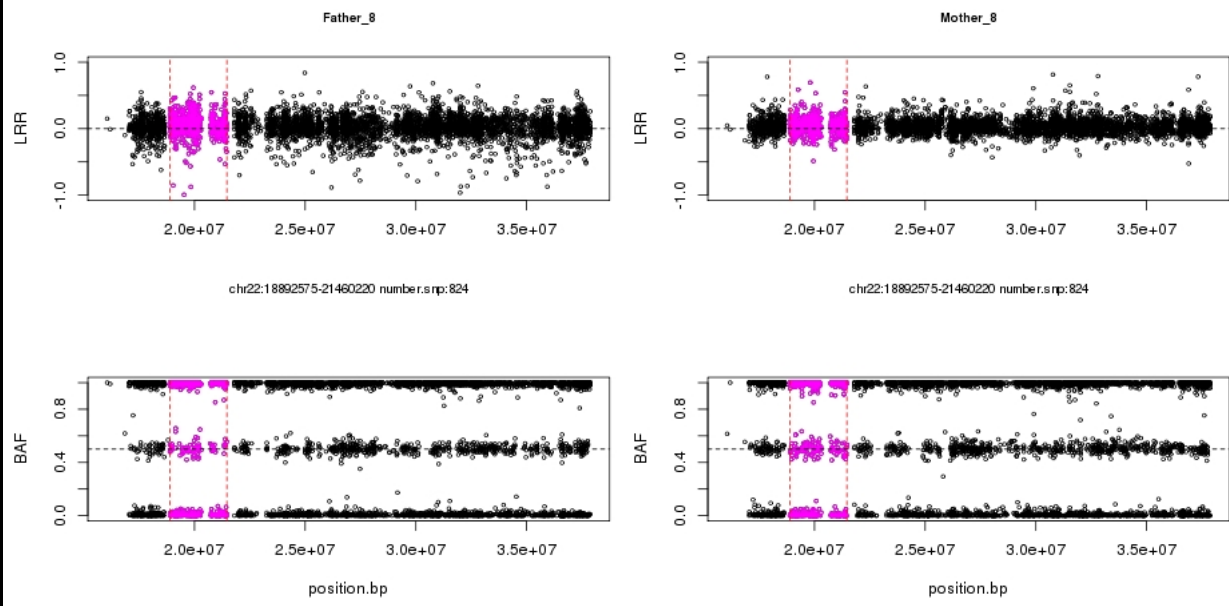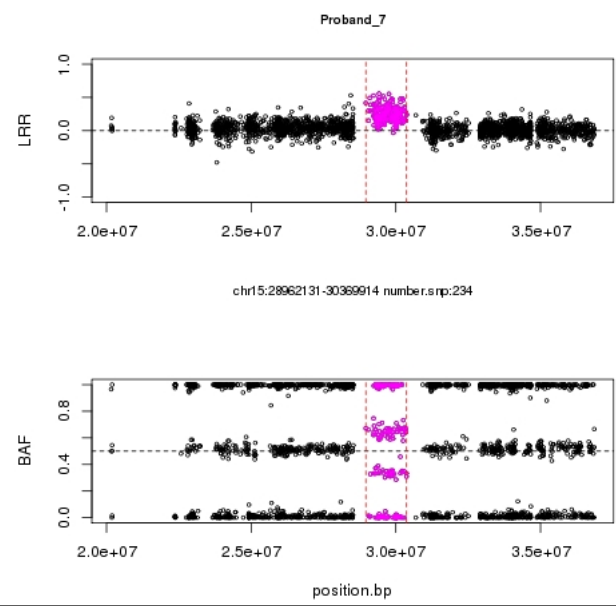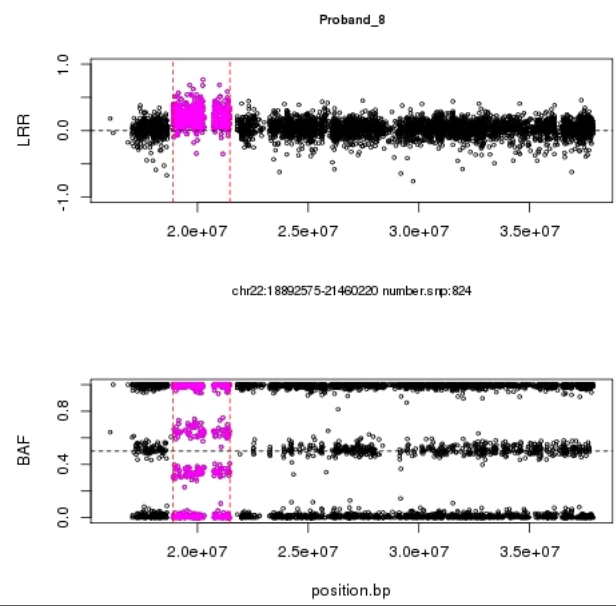

**E)****4q13.1-13.2****4q22.1**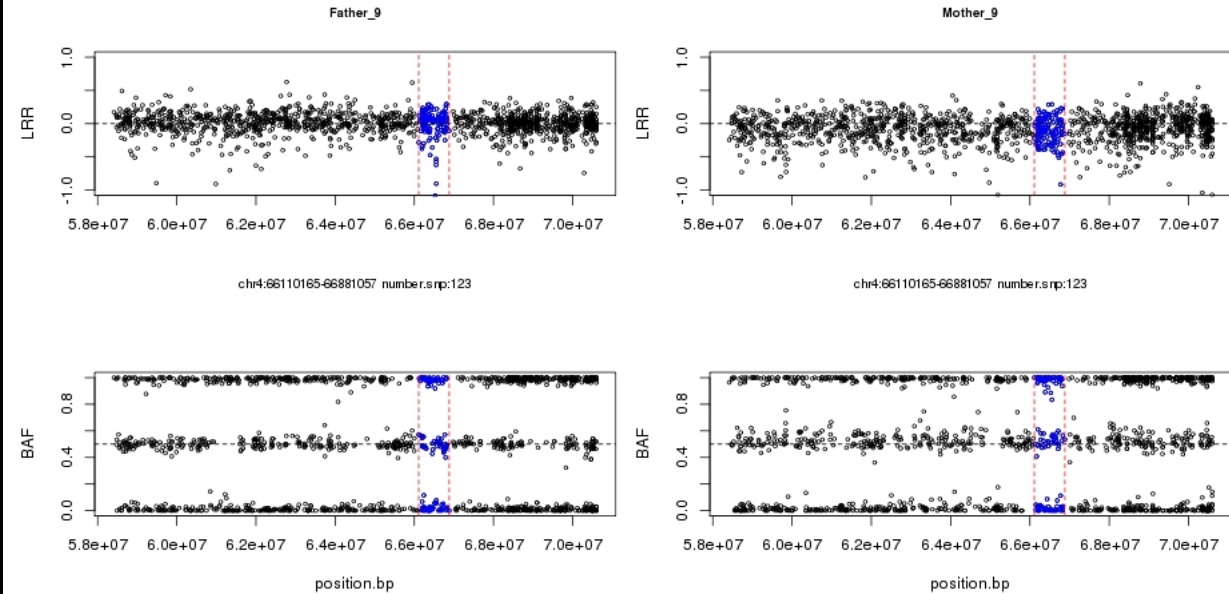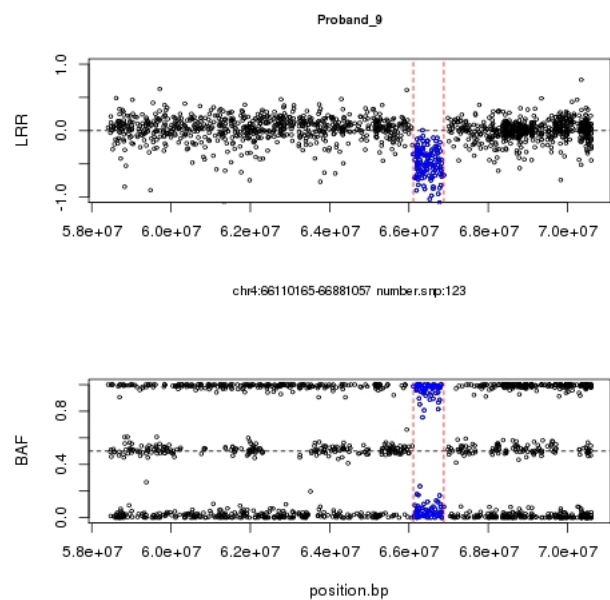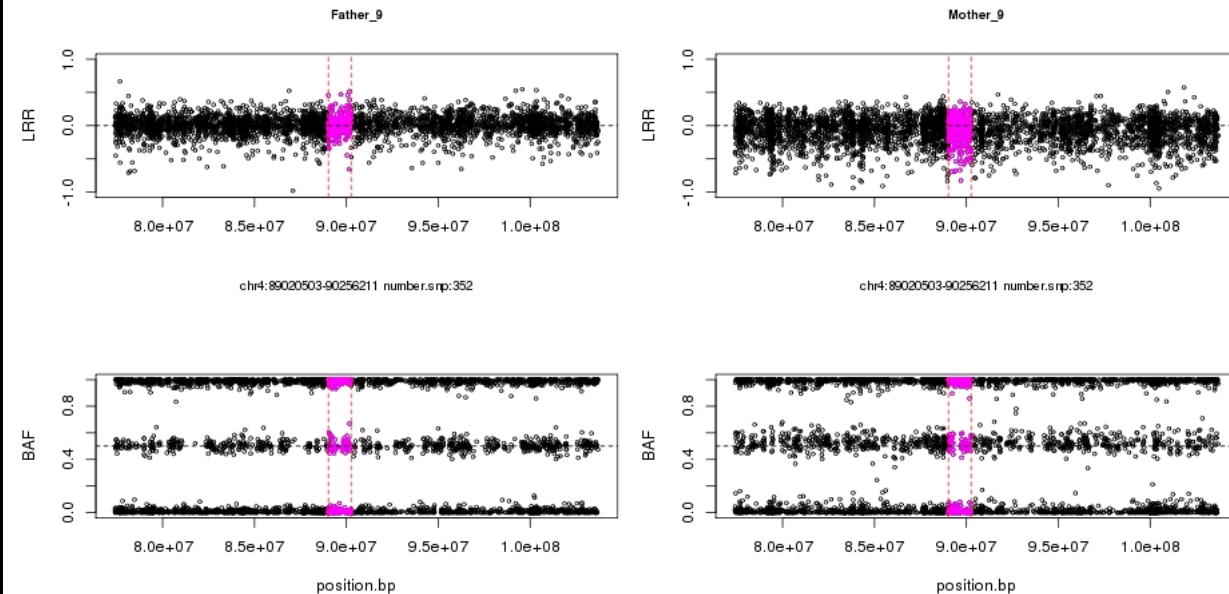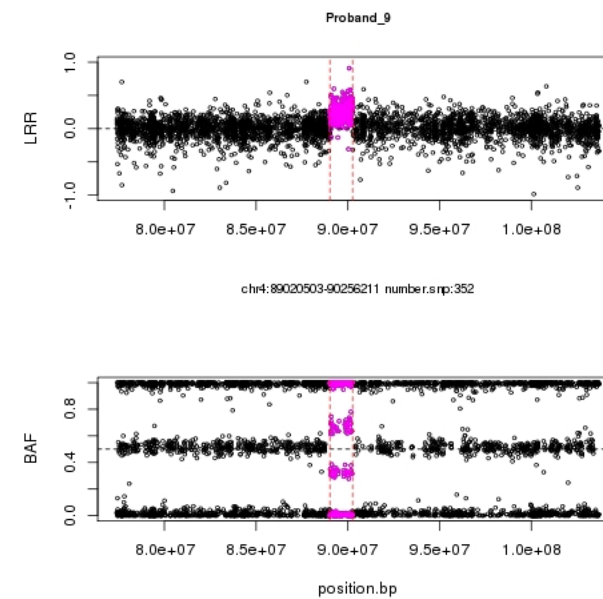



**F)****16p13.3****16p13.11**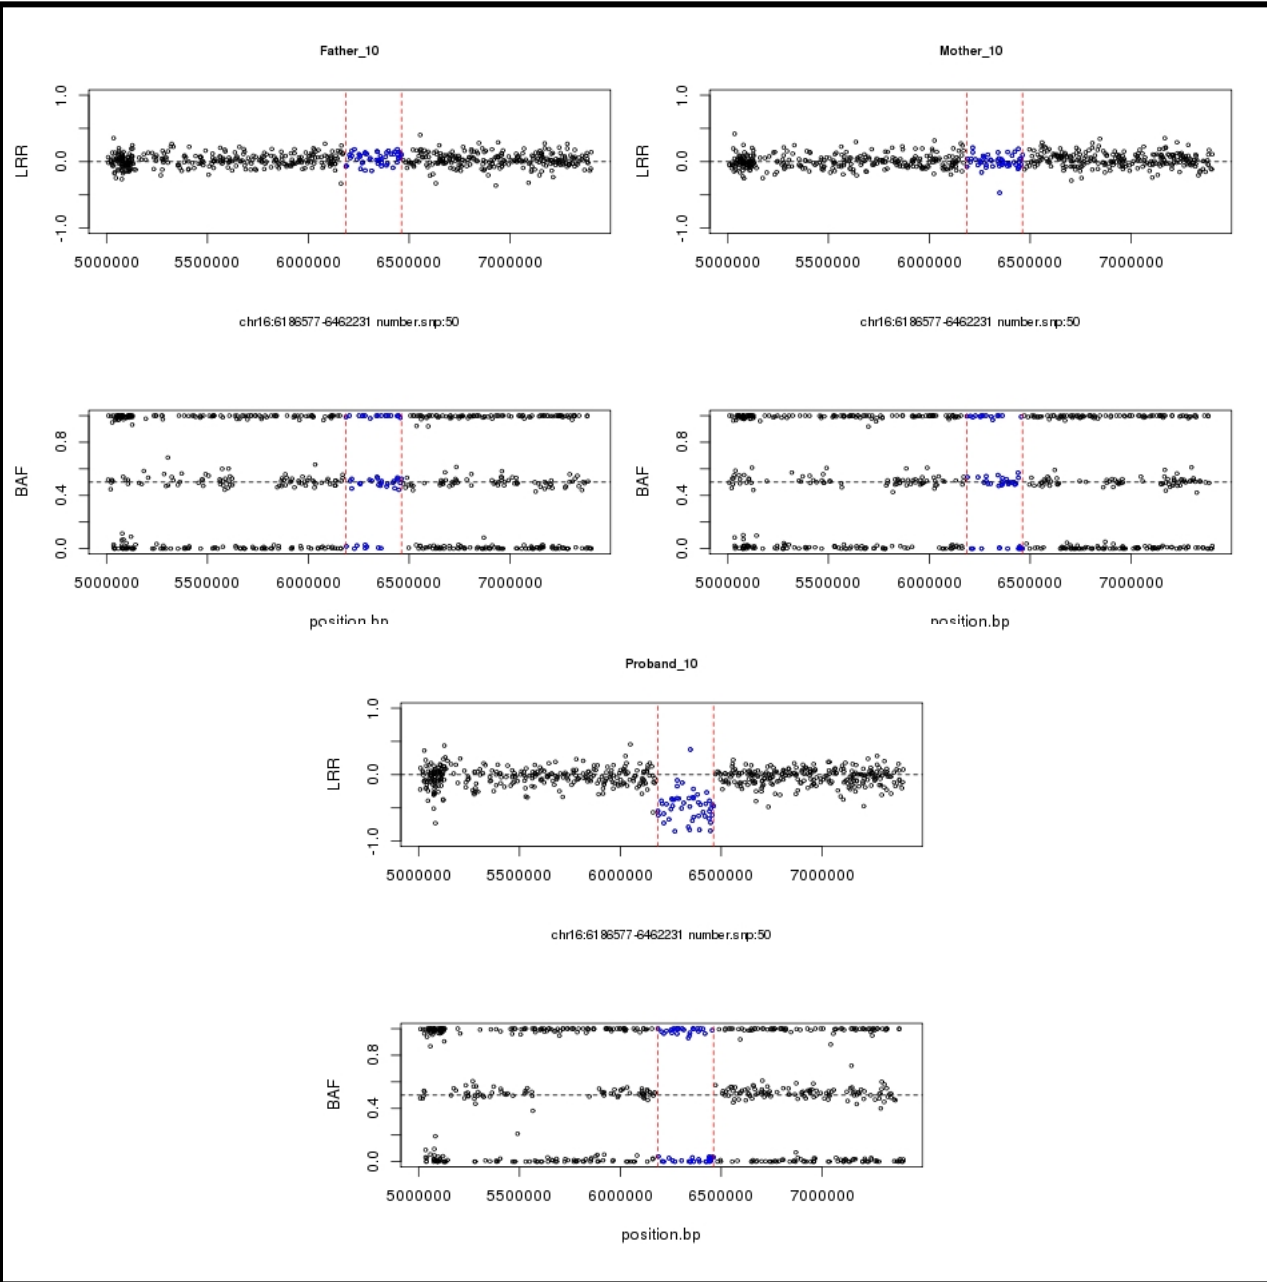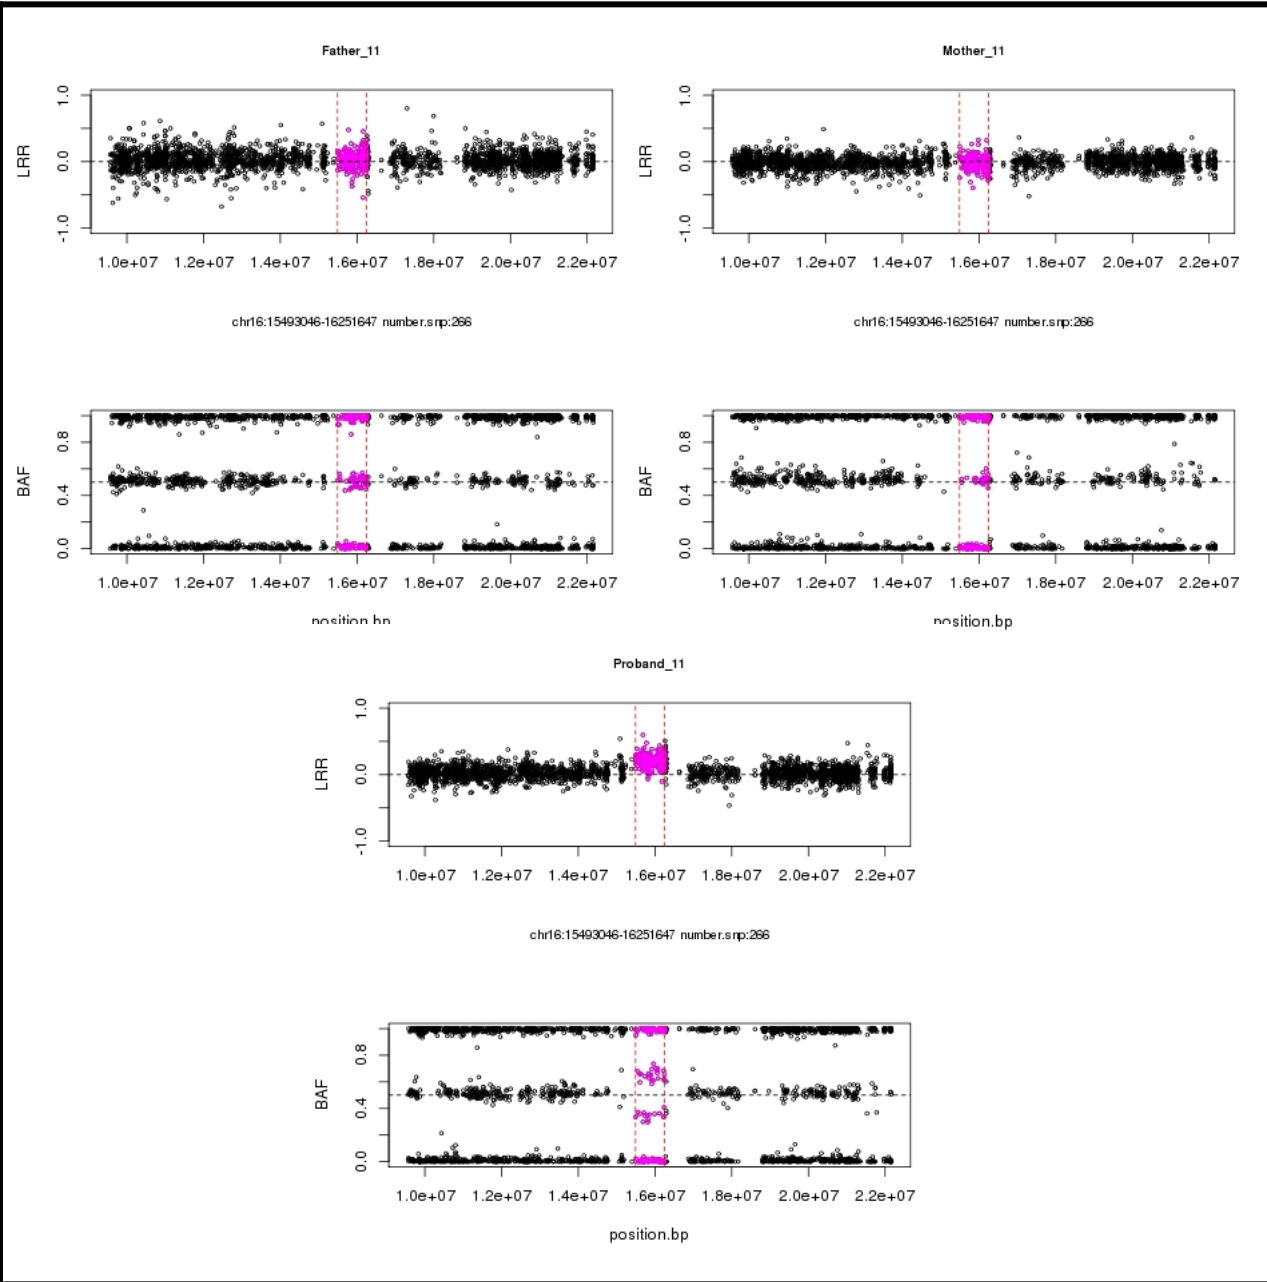

**G)****11p15.4****10q21.3**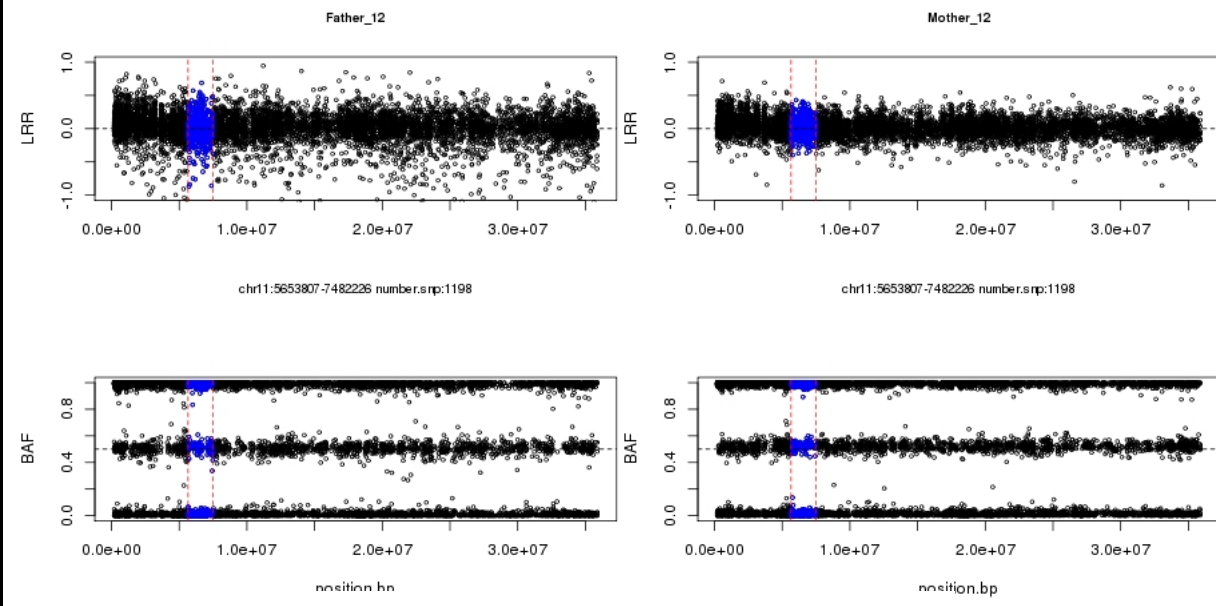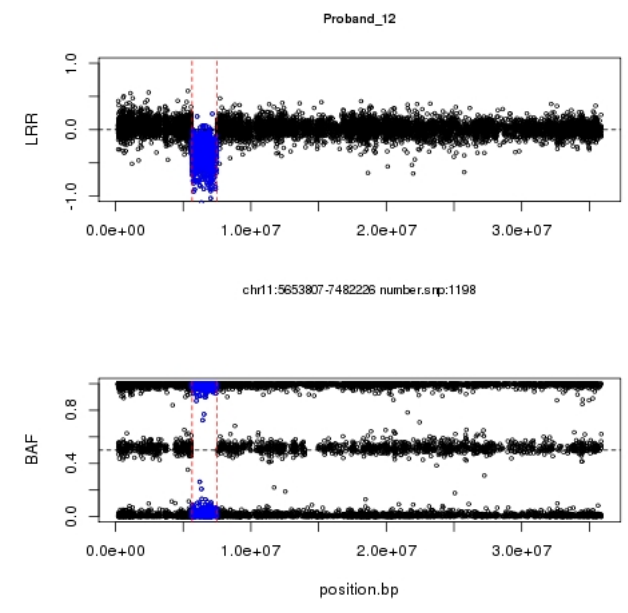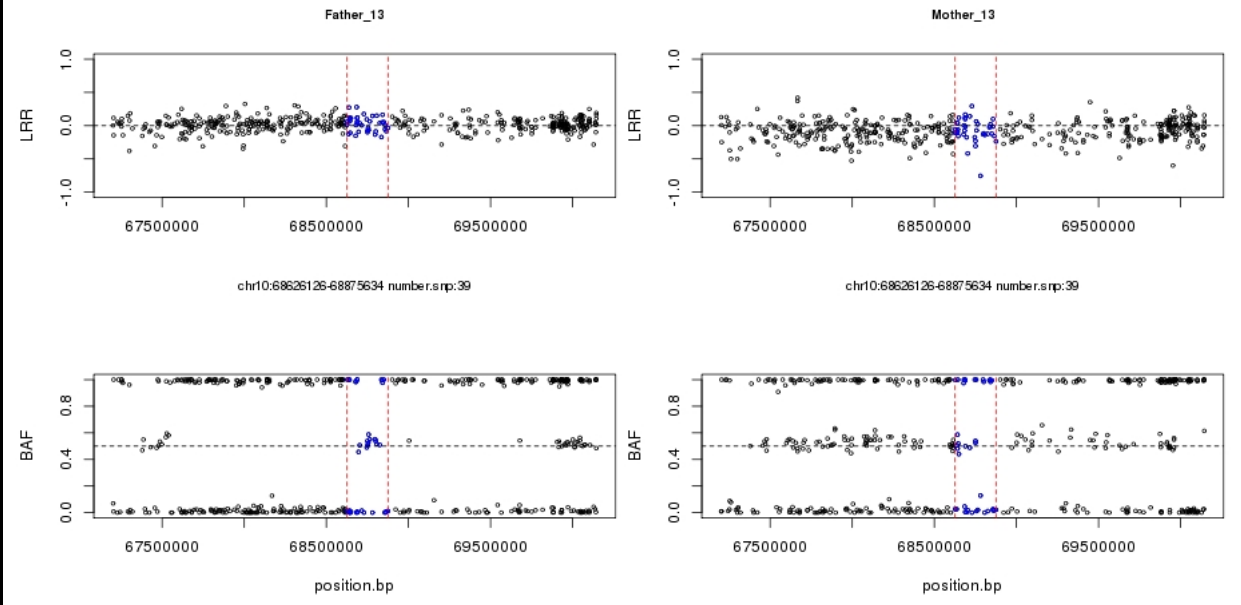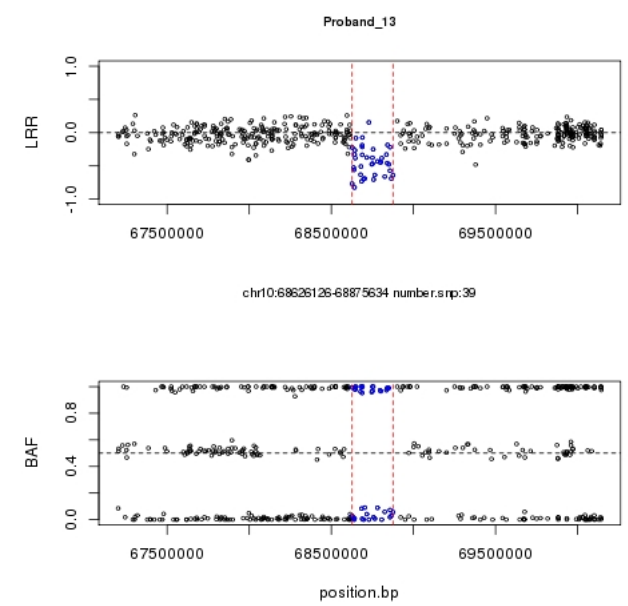

Supplement: 41398_2020_821_MOESM1_ESM.pdf [file 41398_2020_821_MOESM1_ESM.pdf]
